# Supplementary material
Source: publisher site journal article supplement (https://www.spandidos-publications.com/5593/downloadSupplementary)

Figure S1.  $^1\text{H}$  NMR (700 MHz, DMSO- $d_6$ ) spectrum of C251. NMR, nuclear magnetic resonance spectroscopy; ppm, parts per million.

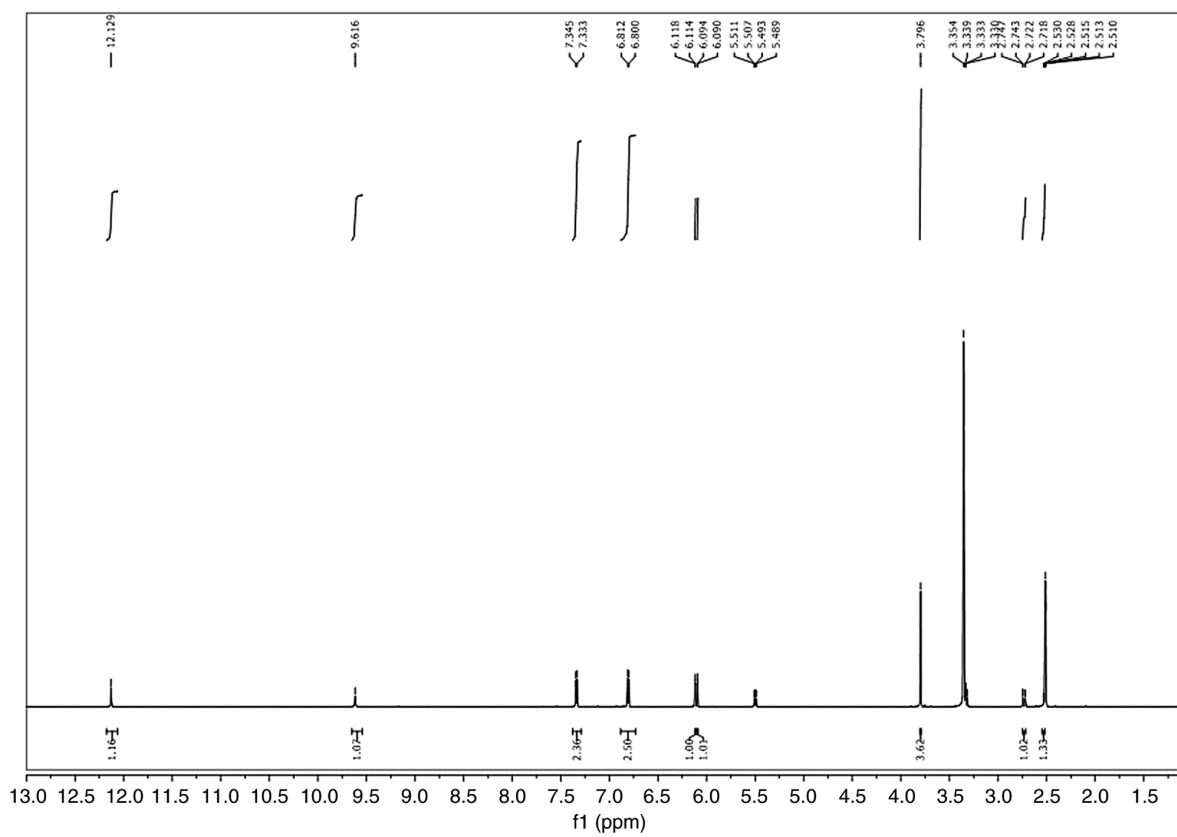

Figure S2.  $^{13}\text{C}$  NMR (175 MHz, DMSO- $d_6$ ) spectrum of C251. NMR, nuclear magnetic resonance spectroscopy; ppm, parts per million.

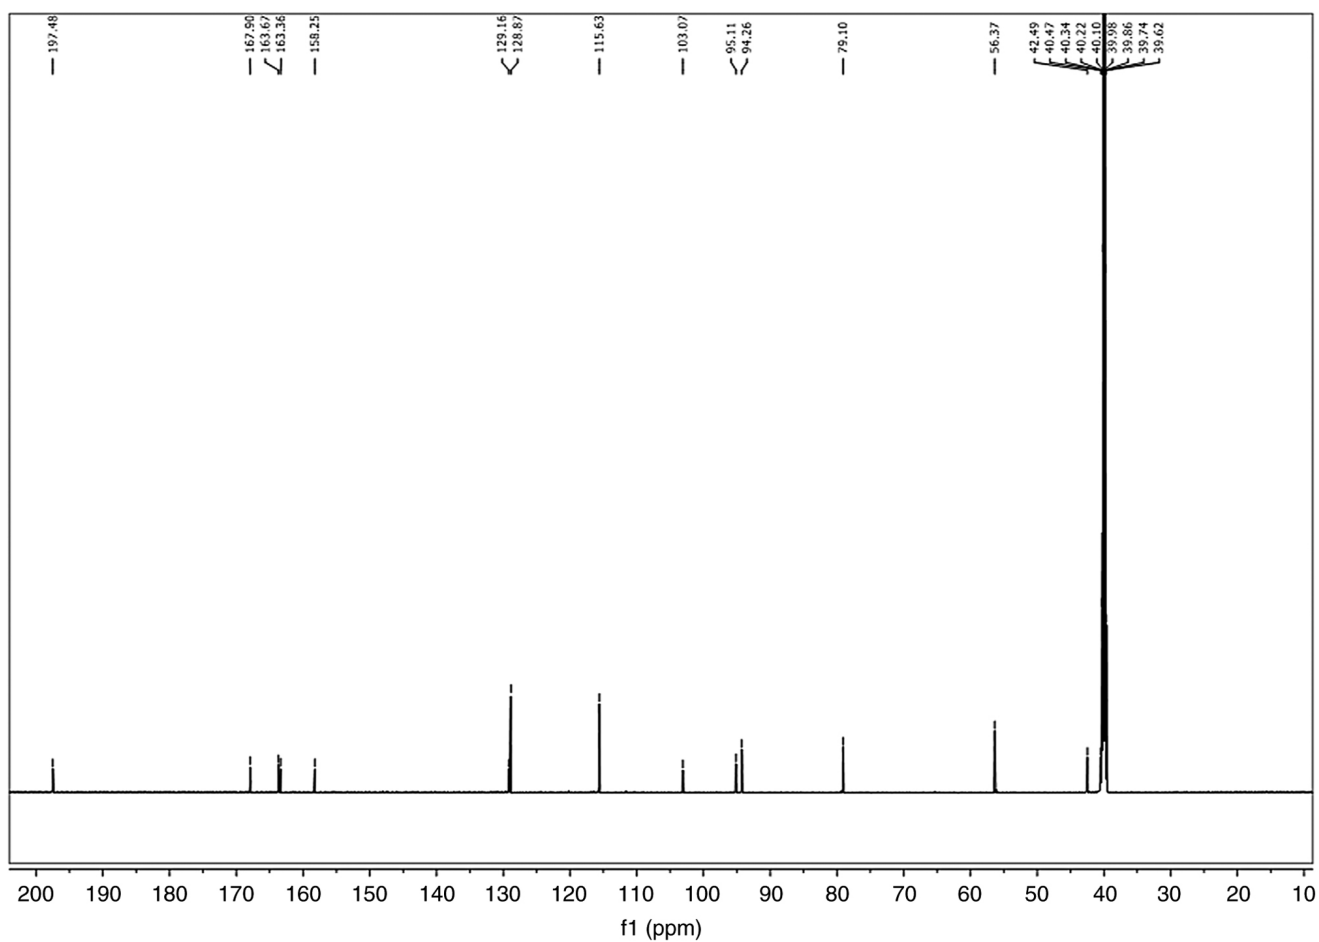

Figure S3. DEPT-135 spectrum of C251. DEPT, distortionless enhancement by polarization transfer; ppm, parts per million.

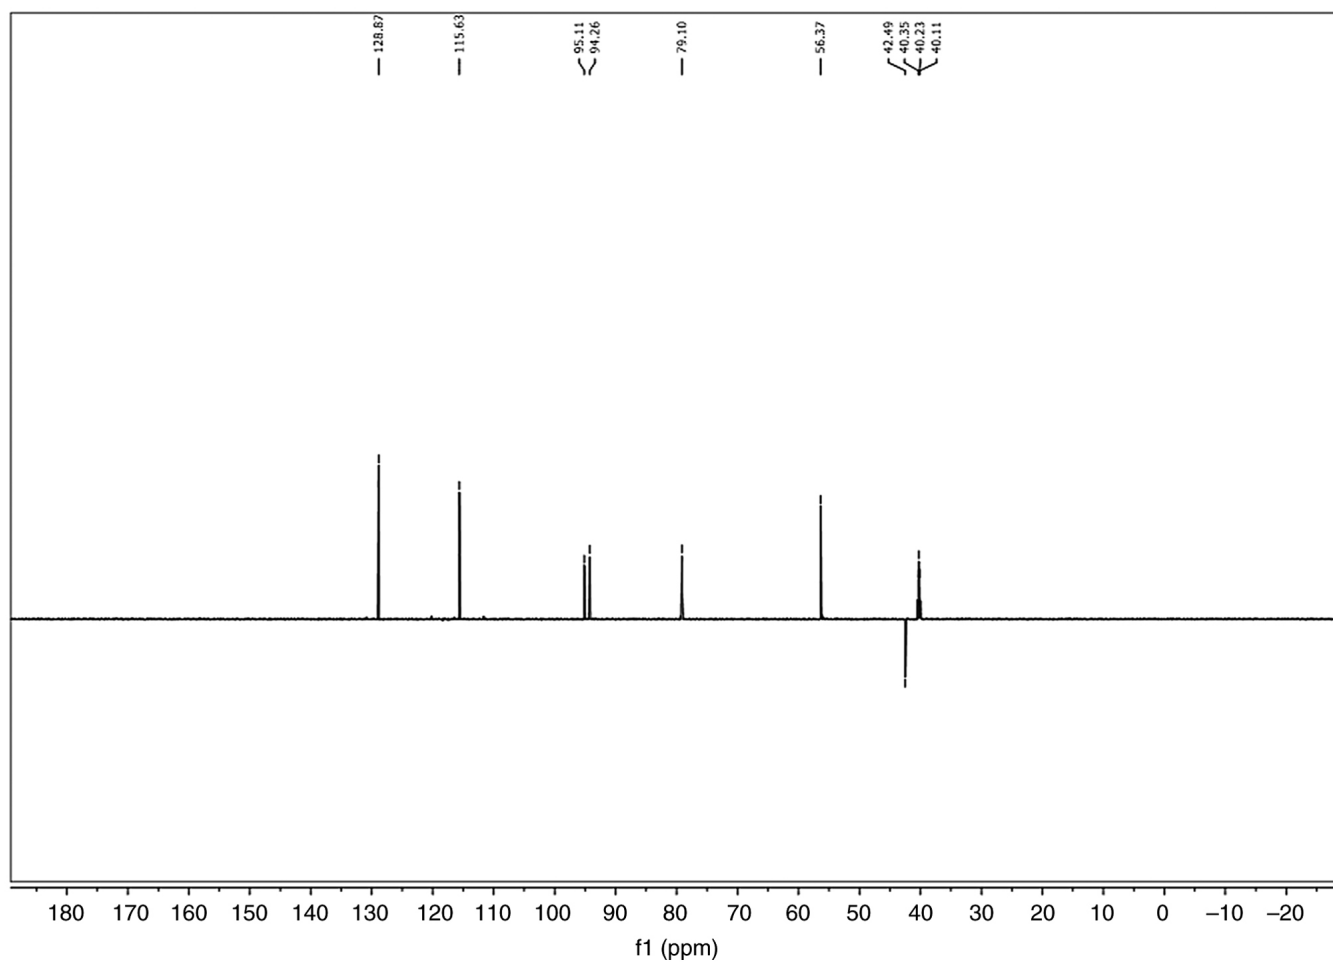

Figure S4. COSY spectrum of C251. COSY, correlation spectroscopy; ppm, parts per million.

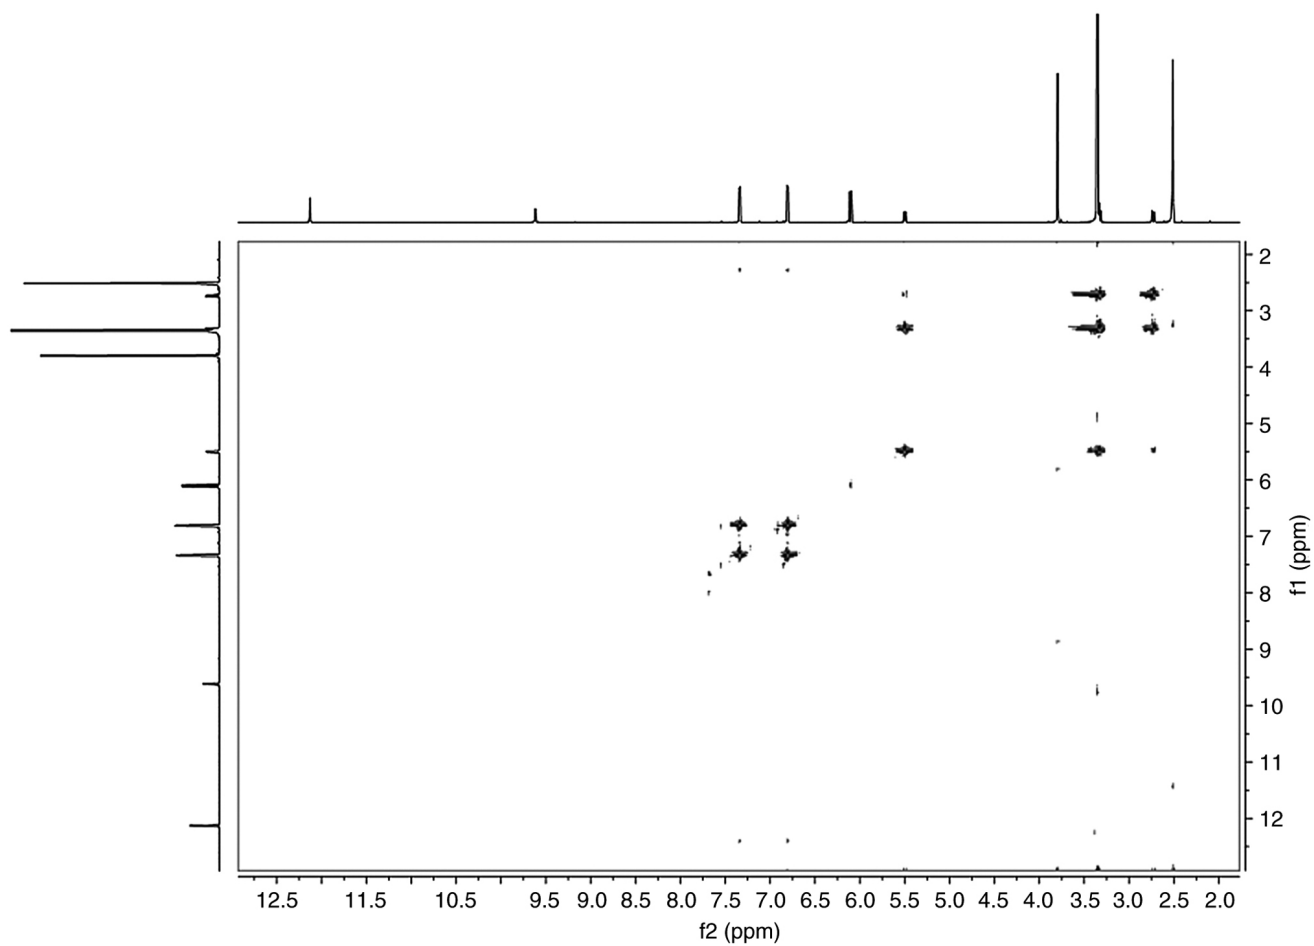

Figure S5. HSQC spectrum of C251. HSQC, heteronuclear single quantum coherence; ppm, parts per million.

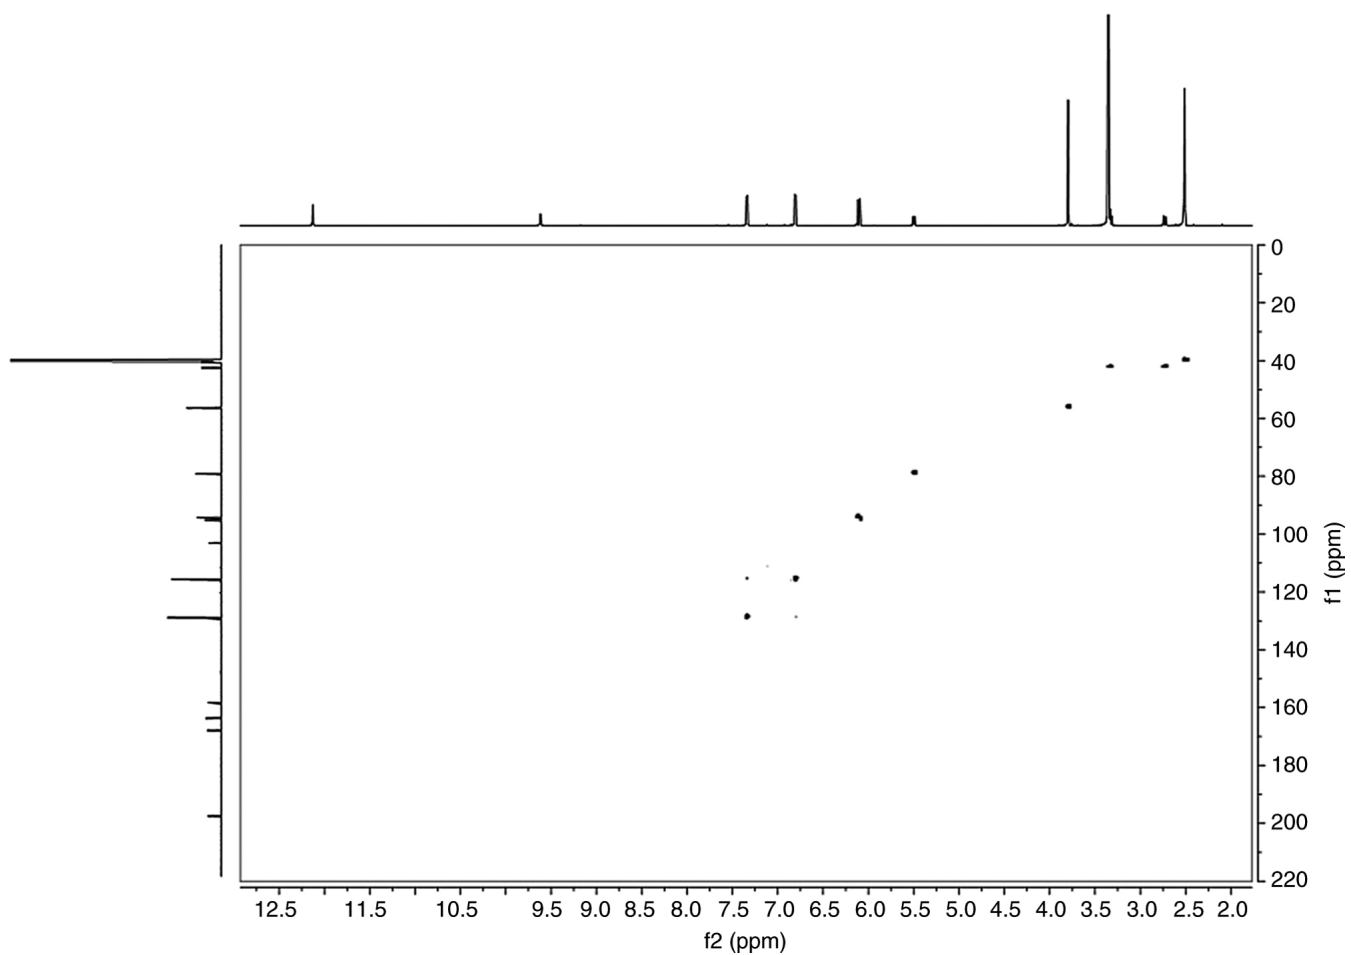

Figure S6. HMBC spectrum of C251. HMBC, heteronuclear multiple bond correlation; ppm, parts per million.

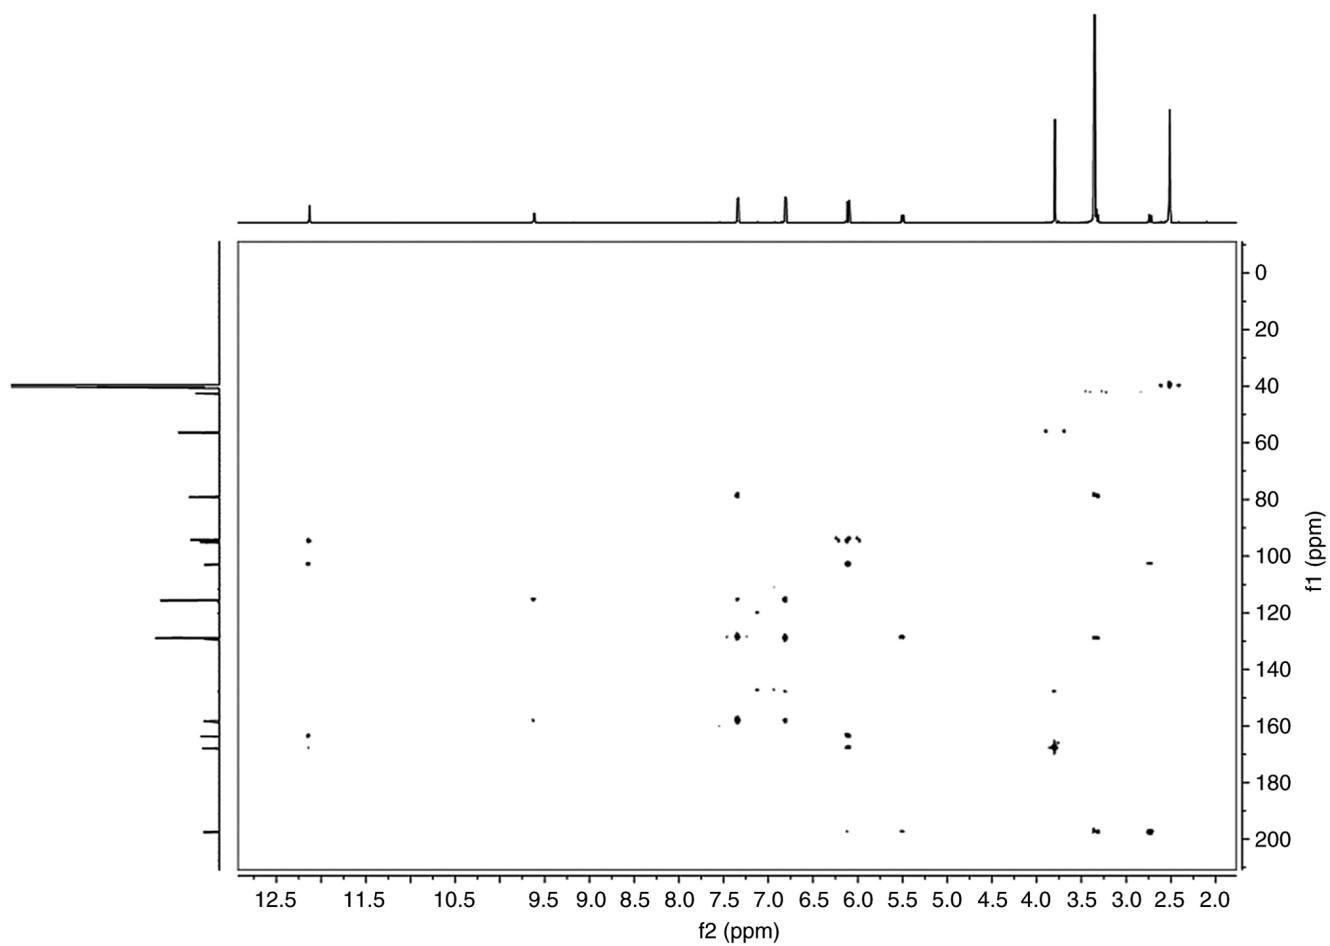

Figure S7.  $^1\text{H}$  NMR (700 MHz, DMSO- $d_6$ ) spectrum of C253. NMR, nuclear magnetic resonance spectroscopy. ppm, parts per million.

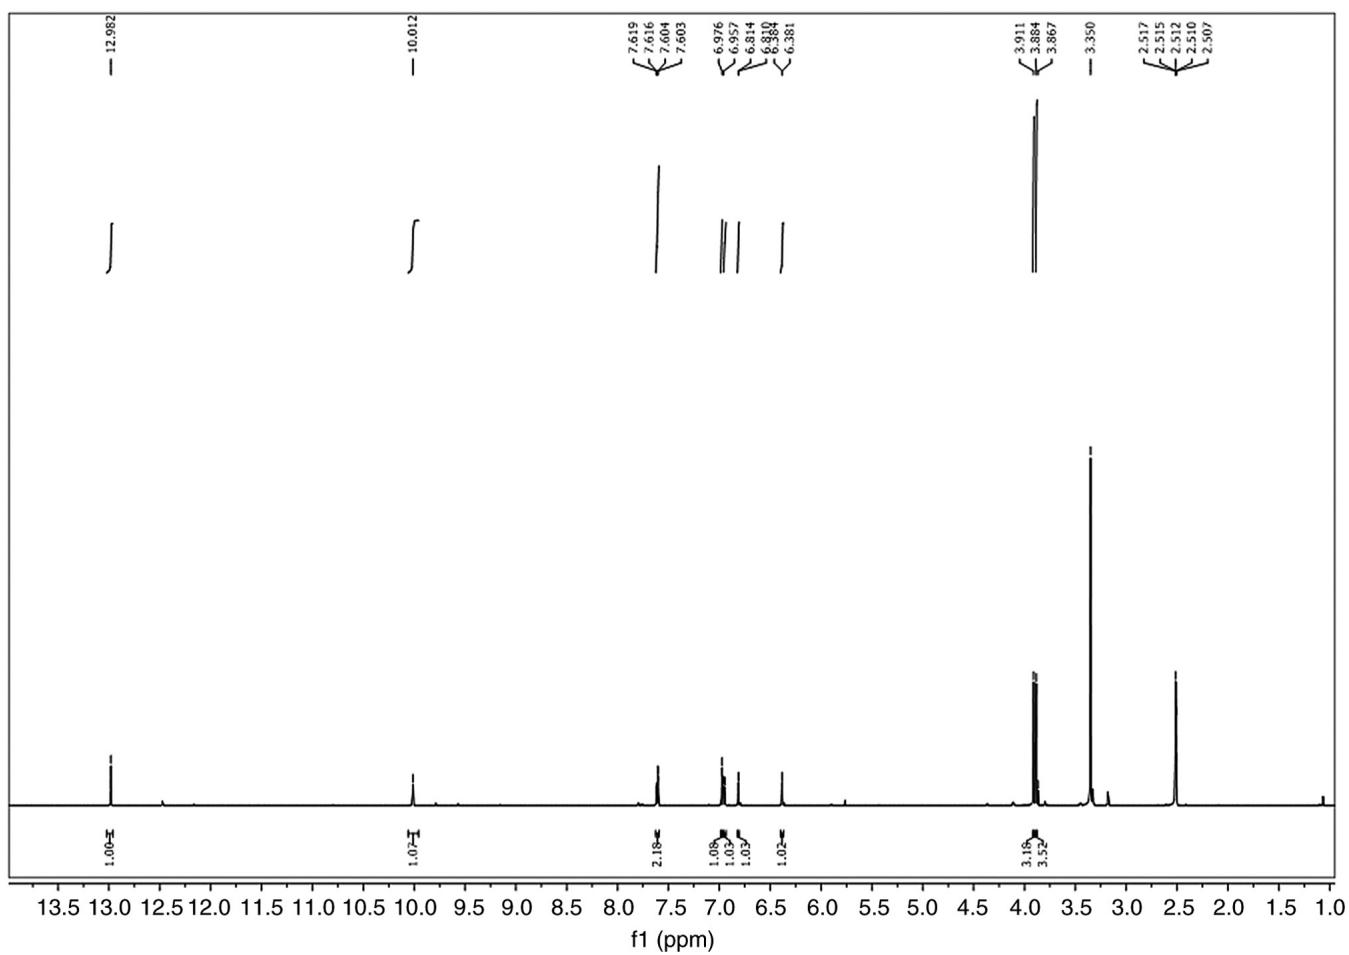

Figure S8.  $^{13}\text{C}$  NMR (175 MHz, DMSO- $d_6$ ) spectrum of C253. NMR, nuclear magnetic resonance spectroscopy. ppm, parts per million.

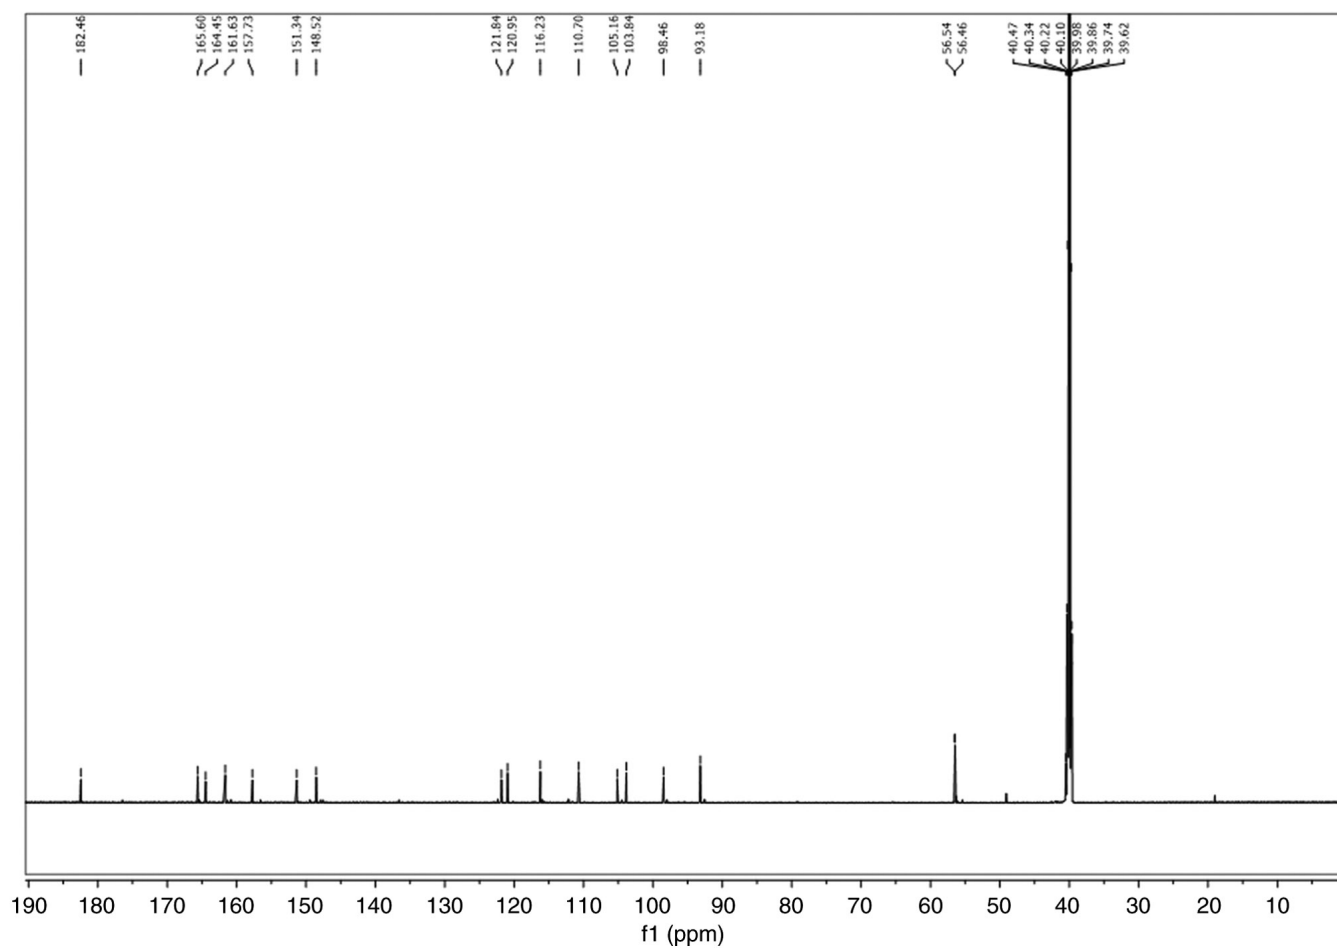

Figure S9. DEPT-135 spectrum of C253. DEPT, distortionless enhancement by polarization transfer; ppm, parts per million.

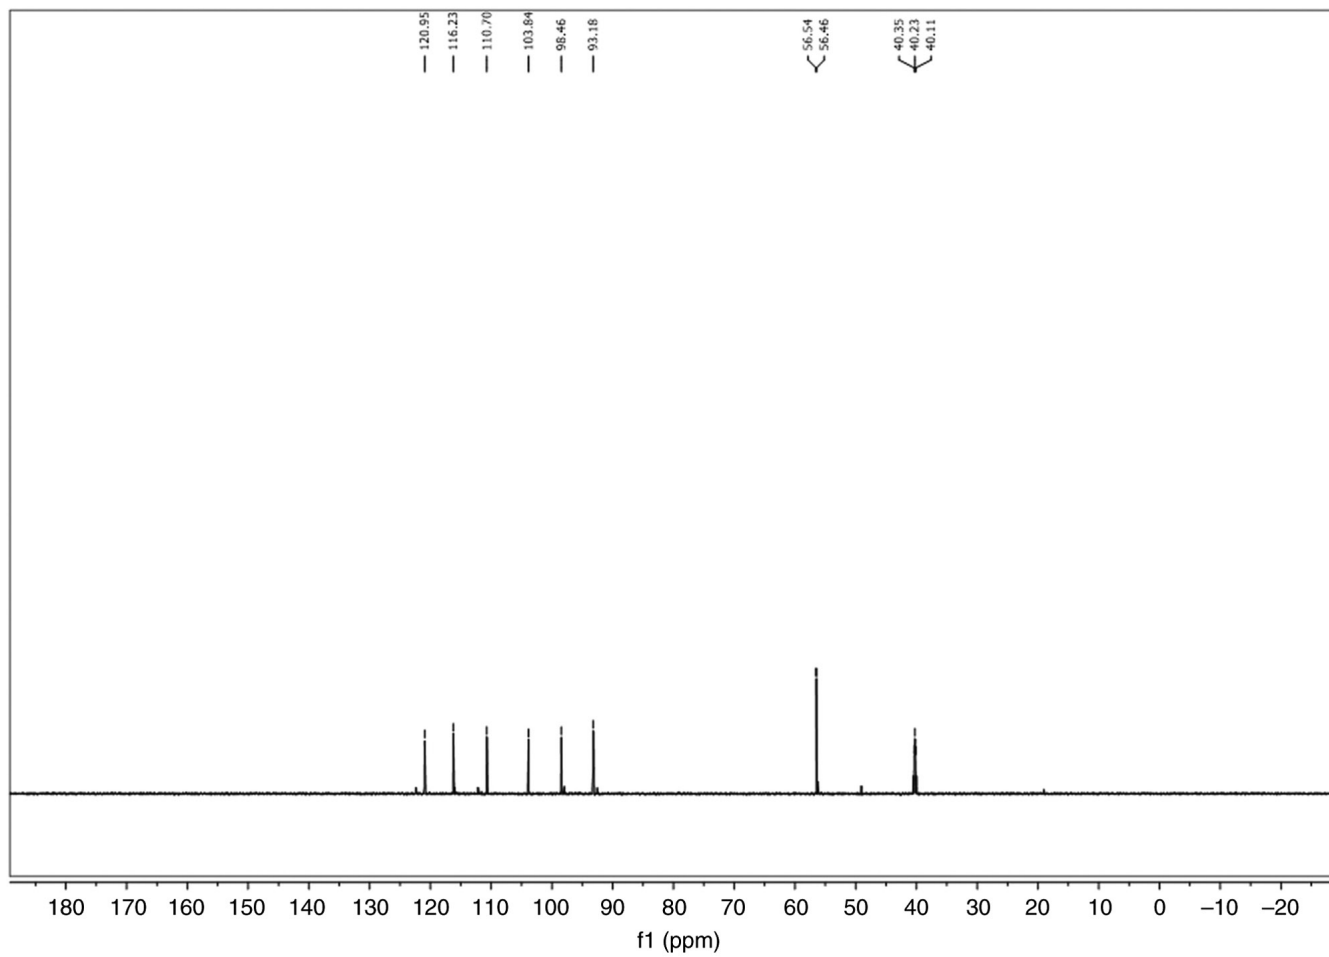

Figure S10. COSY spectrum of C253. COSY, correlation spectroscopy; ppm, parts per million.

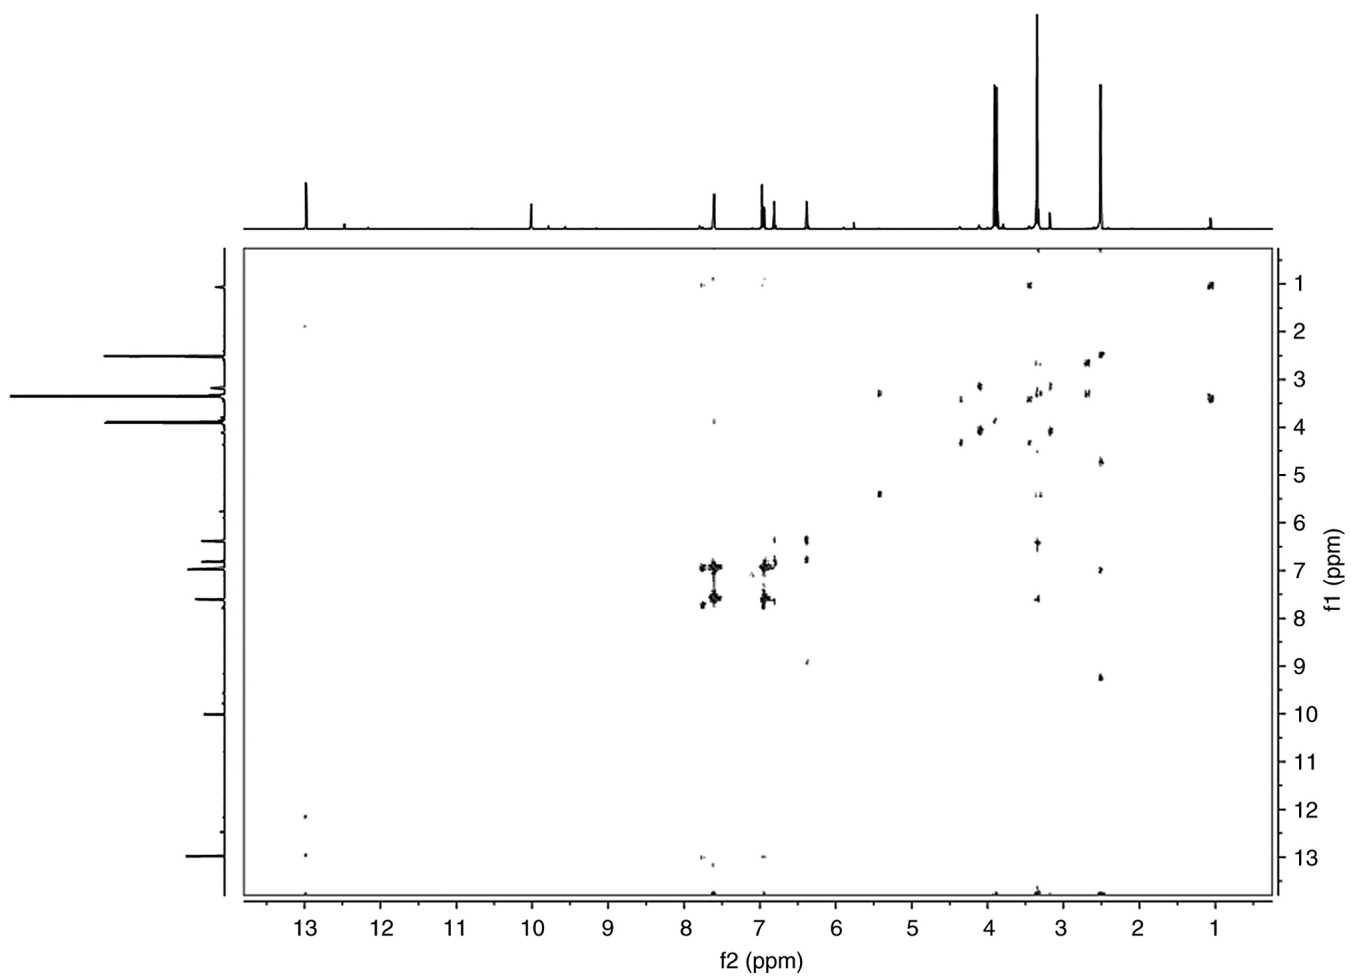

Figure S11. HSQC spectrum of C253. HSQC, heteronuclear single quantum coherence; ppm, parts per million.

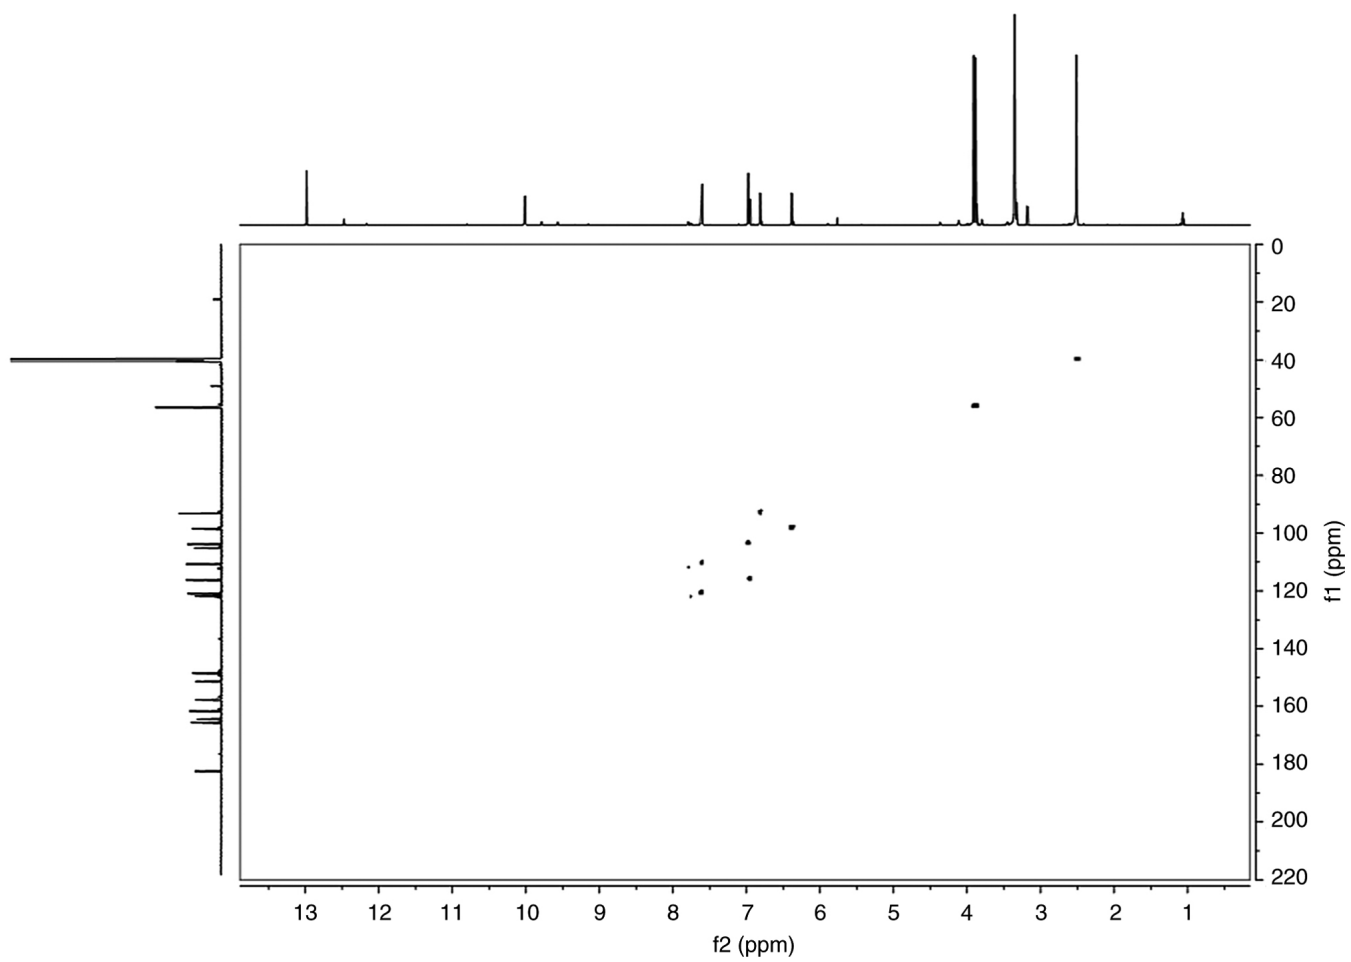

Figure S12. HMBC spectrum of C253. HMBC, heteronuclear multiple bond correlation; ppm, parts per million.

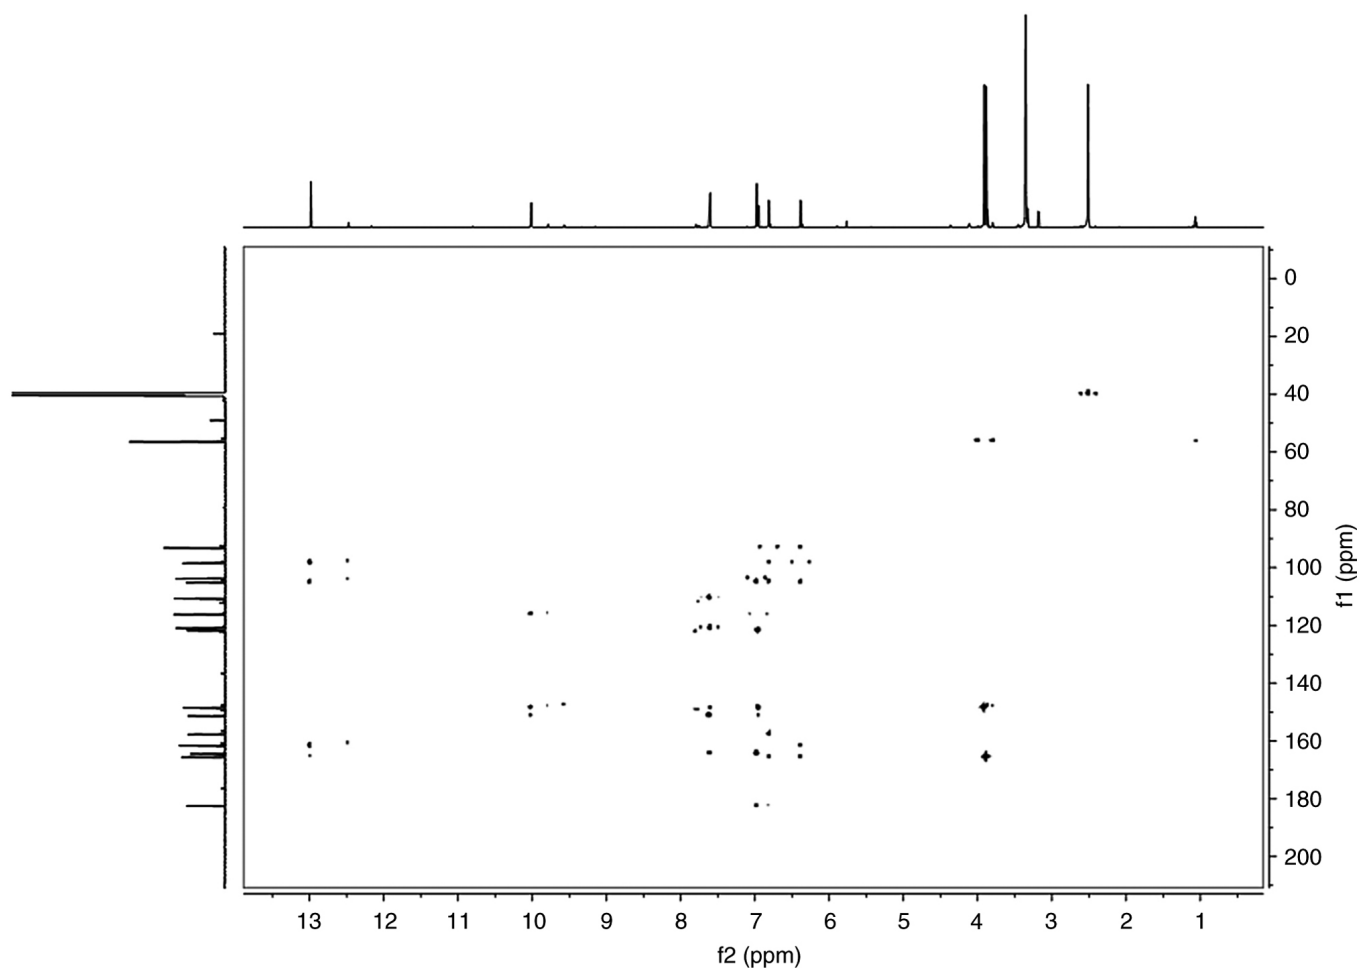

Figure S13. Cell viability assay showing dose-dependent non-cytotoxic effects of the isolated flavonoids on cultured HepG2.2.15 cells at 72 h.

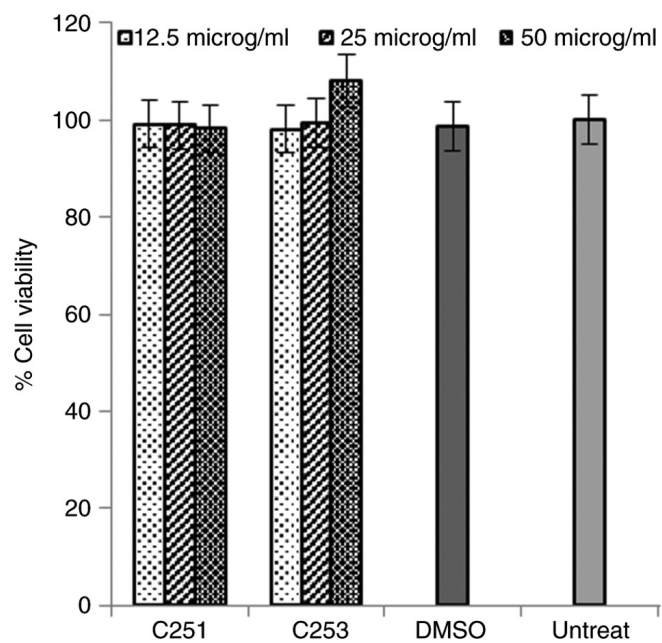

Supplement: Supplementary file 1 [file downloadSupplementary]
